# Supplementary material
Source: PubMed Central journal article supplement (PMC3489095)
Supplement: 97320630008891S1.pdf [file 97320630008891S1.pdf]

## Supplementary materials:

**Table 1:** Sequence ID, database accession number, source organism of cytotoxins, short neurotoxins and related non-toxin proteins and their corresponding functions

| Sequence ID | Protein Name                         | Accession no. | Source organism              | Function                                                                                                                                |
|-------------|--------------------------------------|---------------|------------------------------|-----------------------------------------------------------------------------------------------------------------------------------------|
| CX1.BEC     | Cytotoxin 1                          | 117664        | <i>Naja annulifera</i>       | Shows cytolytic activity                                                                                                                |
| CX2.BEC     | Cytotoxin 2                          | 117676        | <i>Naja annulifera</i>       | Shows cytolytic activity                                                                                                                |
| CX3.BEC     | Cytotoxin 3                          | 117696        | <i>Naja annulifera</i>       | Shows cytolytic activity                                                                                                                |
| CX4.BEC     | Cytotoxin 4                          | 117714        | <i>Naja annulifera</i>       | Shows cytolytic activity                                                                                                                |
| CX5.BEC     | Cytotoxin 5                          | 117718        | <i>Naja annulifera</i>       | Shows cytolytic activity                                                                                                                |
| CX6.BEC     | Cytotoxin 6                          | 117722        | <i>Naja annulifera</i>       | Shows cytolytic activity                                                                                                                |
| CX7.BEC     | Cytotoxin 7                          | 117723        | <i>Naja annulifera</i>       | Shows cytolytic activity                                                                                                                |
| CX8.BEC     | Cytotoxin 8                          | 117724        | <i>Naja annulifera</i>       | Shows cytolytic activity                                                                                                                |
| CX9.BEC     | Cytotoxin 9                          | 117725        | <i>Naja annulifera</i>       | Shows cytolytic activity                                                                                                                |
| CX10.BEC    | Cytotoxin 10                         | 117660        | <i>Naja annulifera</i>       | Shows cytolytic activity                                                                                                                |
| CX1.IC      | Cytotoxin 1                          | 117667        | <i>Naja naja</i>             | Shows cytolytic activity                                                                                                                |
| CX2.IC      | Cytotoxin 2                          | 117680        | <i>Naja naja</i>             | Shows cytolytic activity                                                                                                                |
| CX3.IC      | Cytotoxin 3                          | 117700        | <i>Naja naja</i>             | Shows cytolytic activity                                                                                                                |
| CX7.IC      | Cytotoxin 7                          | 298351639     | <i>Naja naja</i>             | Shows cytolytic activity                                                                                                                |
| NXS1.BEC    | Short neurotoxin 1                   | 55977300      | <i>Naja annulifera</i>       | Produces peripheral paralysis by blocking neuromuscular transmission at the postsynaptic site.                                          |
| NXS2.BEC    | Short neurotoxin 2                   | 128982        | <i>Naja annulifera</i>       | Produces peripheral paralysis by blocking neuromuscular transmission at the postsynaptic site.                                          |
| NXS3.BEC    | Short neurotoxin 3                   | 128986        | <i>Naja annulifera</i>       | Produces peripheral paralysis by blocking neuromuscular transmission at the postsynaptic site.                                          |
| NXS4.BEC    | Short neurotoxin 4                   | 128989        | <i>Naja annulifera</i>       | Produces peripheral paralysis by blocking neuromuscular transmission at the postsynaptic site.                                          |
| Xenoxin 1   | Xenoxin 1                            | 586258        | <i>Xenopus laevis</i>        | Lacks alpha-neurotoxic activity, channel protein activation                                                                             |
| Xenoxin 2   | Xenoxin 2                            | 731166        | <i>Xenopus laevis</i>        | Lacks alpha-neurotoxic activity, channel protein activation                                                                             |
| Xenoxin 3   | Xenoxin 3                            | 731167        | <i>Xenopus laevis</i>        | Lacks alpha-neurotoxic activity, channel protein activation                                                                             |
| HLMP 1      | Leukocyte membrane protein 1         | 5714377       | <i>Eptatretus stoutii</i>    | Acts upon complement system                                                                                                             |
| HEP21.C     | Hep21 protein                        | 45383131      | <i>Gallus gallus</i>         | Related to Ly-6 protein                                                                                                                 |
| HEP21.T     | Hep21 protein                        | 326930094     | <i>Meleagris gallopavo</i>   | Related to Ly-6 protein                                                                                                                 |
| PMF.PS      | Plethodontid modulating factor       | 113912825     | <i>Plethodon shermani</i>    | Act as a pheromone protein, affects female receptivity                                                                                  |
| PMF.PC      | Plethodontid modulating factor       | 113913043     | <i>Plethodon cheoah</i>      | Act as a pheromone protein, affects female receptivity                                                                                  |
| PMF.PY      | Plethodontid modulating factor       | 113913185     | <i>Plethodon yonahlossee</i> | Act as a pheromone protein, affects female receptivity                                                                                  |
| CD59.H      | CD59 glycoprotein                    | 116021        | <i>Homo sapiens</i>          | Potent inhibitor of the complement membrane attack complex (MAC) action                                                                 |
| CD58.M      | CD59 glycoprotein                    | 13878360      | <i>Mus musculus</i>          | Potent inhibitor of the complement membrane attack complex (MAC) action                                                                 |
| CD59.R      | CD59 glycoprotein                    | 2507508       | <i>Rattus norvegicus</i>     | Potent inhibitor of the complement membrane attack complex (MAC) action                                                                 |
| Ly6H.H      | Lymphocyte antigen 6H                | 10720070      | <i>Homo sapiens</i>          | Involved in cellular interaction, activation of T lymphocytes                                                                           |
| Ly6H.CM     | Lymphocyte antigen 6H                | 167008973     | <i>Macaca fascicularis</i>   | Involved in cellular interaction                                                                                                        |
| Ly6H.B      | Lymphocyte antigen 6H                | 167008972     | <i>Bos taurus</i>            | Involved in cellular interaction                                                                                                        |
| Ly6H.M      | Lymphocyte antigen 6H                | 10720078      | <i>Mus musculus</i>          | Involved in cellular interaction                                                                                                        |
| SLURP1.H    | Secreted Ly-6/uPAR-related protein 1 | 3287957       | <i>Homo sapiens</i>          | Has an antitumor activity, Implicated in maintaining the physiological and structural integrity of the keratinocyte layers of the skin. |
| SLURP1.M    | Secreted Ly-6/uPAR-related protein 1 | 14916717      | <i>Mus musculus</i>          | T cell activation & cell to cell adhesion, Was found to be a marker of late differentiation of the skin                                 |
| SLURP2.H    | Secreted Ly6/uPAR related protein 2  | 74727391      | <i>Homo sapiens</i>          | Regulation of lymphocyte function                                                                                                       |
| SLURP2.M    | Secreted Ly6/uPAR related protein 2  | 123778205     | <i>Mus musculus</i>          | Regulation of lymphocyte function                                                                                                       |
| Lynx1.H     | Ly-6/neurotoxin-like protein 1       | 47117907      | <i>Homo sapiens</i>          | Seems to modulate nicotinic acetylcholine receptors                                                                                     |
| Lynx1.C     | Ly-6/neurotoxin-like protein 1       | 61214436      | <i>Pan troglodytes</i>       | Seems to modulate nicotinic acetylcholine receptors                                                                                     |
| Lynx1.RM    | Ly-6/neurotoxin-like protein 1       | 46576878      | <i>Macaca mulatta</i>        | Seems to modulate nicotinic acetylcholine receptors                                                                                     |
| Lynx1.BM    | Ly-6/neurotoxin-like protein 1       | 75040497      | <i>Saimiri boliviensis</i>   | Seems to modulate nicotinic acetylcholine receptors                                                                                     |
| Lynx1.B     | Ly-6/neurotoxin-like protein 1       | 126256577     | <i>Bos taurus</i>            | Seems to modulate nicotinic acetylcholine receptors                                                                                     |
| Lynx1.M     | Ly-6/neurotoxin-like protein 1       | 24212024      | <i>Mus musculus</i>          | Seems to modulate nicotinic acetylcholine receptors                                                                                     |

**Table 2:** Amino acid composition profile (in %) of various snake venom toxin proteins and related non-toxin proteins of other chordates

| Seq. ID   | Ala | Cys  | Asp  | Glu  | Phe | Gly | His | Ile | Lys  | Leu  | Met | Asn  | Pro  | Gln | Arg | Ser  | Thr  | Val  | Trp | Tyr  |
|-----------|-----|------|------|------|-----|-----|-----|-----|------|------|-----|------|------|-----|-----|------|------|------|-----|------|
| CX1.BEC   | 1.7 | 13.3 | 3.3  | 1.7  | 1.7 | 3.3 | 1.7 | 1.7 | 15.0 | 6.7  | 3.3 | 5.0  | 8.3  | 0.0 | 1.7 | 6.7  | 6.7  | 13.3 | 1.7 | 3.3  |
| CX2.BEC   | 3.3 | 13.3 | 5.0  | 1.7  | 1.7 | 3.3 | 1.7 | 1.7 | 15.0 | 8.3  | 6.7 | 5.0  | 10.0 | 0.0 | 1.7 | 1.7  | 5.0  | 8.3  | 1.7 | 5.0  |
| CX3.BEC   | 1.7 | 13.3 | 3.3  | 1.7  | 1.7 | 3.3 | 0.0 | 1.7 | 15.0 | 8.3  | 3.3 | 6.7  | 8.3  | 0.0 | 1.7 | 3.3  | 6.7  | 11.7 | 1.7 | 6.7  |
| CX4.BEC   | 1.7 | 13.3 | 1.7  | 0.0  | 1.7 | 3.3 | 0.0 | 3.3 | 16.7 | 8.3  | 3.3 | 10.0 | 8.3  | 0.0 | 1.7 | 3.3  | 6.7  | 10.0 | 1.7 | 5.0  |
| CX5.BEC   | 3.3 | 13.3 | 1.7  | 1.7  | 1.7 | 3.3 | 1.7 | 3.3 | 15.0 | 6.7  | 6.7 | 8.3  | 10.0 | 0.0 | 1.7 | 1.7  | 5.0  | 8.3  | 1.7 | 5.0  |
| CX6.BEC   | 3.3 | 13.3 | 3.3  | 1.7  | 1.7 | 3.3 | 1.7 | 1.7 | 15.0 | 8.3  | 6.7 | 6.7  | 10.0 | 0.0 | 1.7 | 1.7  | 5.0  | 8.3  | 1.7 | 5.0  |
| CX7.BEC   | 3.3 | 13.3 | 1.7  | 1.7  | 1.7 | 3.3 | 1.7 | 1.7 | 15.0 | 8.3  | 6.7 | 8.3  | 10.0 | 0.0 | 1.7 | 1.7  | 5.0  | 8.3  | 1.7 | 5.0  |
| CX8.BEC   | 1.7 | 13.3 | 1.7  | 1.7  | 1.7 | 3.3 | 1.7 | 1.7 | 15.0 | 8.3  | 3.3 | 8.3  | 8.3  | 0.0 | 1.7 | 3.3  | 6.7  | 11.7 | 1.7 | 5.0  |
| CX9.BEC   | 3.3 | 13.3 | 5.0  | 3.3  | 1.7 | 3.3 | 1.7 | 3.3 | 11.7 | 6.7  | 3.3 | 6.7  | 6.7  | 0.0 | 3.3 | 5.0  | 6.7  | 11.7 | 0.0 | 3.3  |
| CX10.BEC  | 3.3 | 13.3 | 3.3  | 3.3  | 1.7 | 3.3 | 1.7 | 5.0 | 10.0 | 6.7  | 3.3 | 8.3  | 6.7  | 1.7 | 3.3 | 5.0  | 6.7  | 10.0 | 0.0 | 3.3  |
| CX1.IC    | 3.3 | 13.3 | 3.3  | 1.7  | 0.0 | 3.3 | 0.0 | 3.3 | 15.0 | 10.0 | 3.3 | 10.0 | 6.7  | 0.0 | 3.3 | 3.3  | 5.0  | 8.3  | 0.0 | 6.7  |
| CX2.IC    | 3.3 | 13.3 | 3.3  | 0.0  | 1.7 | 3.3 | 0.0 | 1.7 | 15.0 | 10.0 | 3.3 | 6.7  | 8.3  | 0.0 | 3.3 | 3.3  | 5.0  | 11.7 | 0.0 | 6.7  |
| CX3.IC    | 3.3 | 13.3 | 3.3  | 0.0  | 1.7 | 3.3 | 0.0 | 3.3 | 15.0 | 10.0 | 3.3 | 10.0 | 6.7  | 0.0 | 3.3 | 3.3  | 5.0  | 10.0 | 0.0 | 5.0  |
| CX7.IC    | 3.3 | 13.3 | 5.0  | 1.7  | 0.0 | 3.3 | 0.0 | 3.3 | 15.0 | 10.0 | 3.3 | 8.3  | 6.7  | 0.0 | 3.3 | 3.3  | 5.0  | 8.3  | 0.0 | 6.7  |
| NXS1.BEC  | 0.0 | 13.1 | 3.3  | 6.6  | 0.0 | 8.2 | 3.3 | 4.9 | 9.8  | 1.6  | 0.0 | 8.2  | 6.6  | 4.9 | 6.6 | 6.6  | 11.5 | 1.6  | 1.6 | 1.6  |
| NXS2.BEC  | 0.0 | 13.1 | 1.6  | 3.3  | 0.0 | 9.8 | 3.3 | 8.2 | 11.5 | 0.0  | 1.6 | 6.6  | 6.6  | 4.9 | 8.2 | 4.9  | 8.2  | 3.3  | 1.6 | 3.3  |
| NXS3.BEC  | 0.0 | 13.1 | 1.6  | 4.9  | 1.6 | 9.8 | 1.6 | 9.8 | 11.5 | 1.6  | 1.6 | 4.9  | 4.9  | 6.6 | 4.9 | 4.9  | 8.2  | 3.3  | 1.6 | 3.3  |
| NXS4.BEC  | 0.0 | 13.1 | 1.6  | 4.9  | 1.6 | 9.8 | 1.6 | 9.8 | 11.5 | 1.6  | 1.6 | 4.9  | 4.9  | 4.9 | 6.6 | 4.9  | 8.2  | 3.3  | 1.6 | 3.3  |
| Xenoxin-1 | 6.1 | 12.1 | 1.5  | 6.1  | 1.5 | 6.1 | 0.0 | 4.5 | 12.1 | 10.6 | 6.1 | 6.1  | 1.5  | 4.5 | 3.0 | 4.5  | 12.1 | 1.5  | 0.0 | 0.0  |
| Xenoxin-2 | 6.1 | 12.1 | 3.0  | 6.1  | 1.5 | 4.5 | 0.0 | 6.1 | 15.2 | 10.6 | 6.1 | 7.6  | 1.5  | 3.0 | 3.0 | 4.5  | 7.6  | 1.5  | 0.0 | 0.0  |
| Xenoxin-3 | 7.6 | 12.1 | 3.0  | 6.1  | 1.5 | 4.5 | 0.0 | 4.5 | 13.6 | 10.6 | 4.5 | 6.1  | 1.5  | 4.5 | 3.0 | 4.5  | 9.1  | 3.0  | 0.0 | 0.0  |
| HLMP1     | 4.1 | 10.8 | 6.8  | 5.4  | 0.0 | 5.4 | 1.4 | 2.7 | 17.6 | 4.1  | 1.4 | 5.4  | 1.4  | 5.4 | 1.4 | 6.8  | 10.8 | 8.1  | 0.0 | 1.4  |
| Hep21.C   | 5.7 | 11.4 | 6.8  | 8.0  | 1.1 | 5.7 | 1.1 | 3.4 | 6.8  | 6.8  | 0.0 | 3.4  | 2.3  | 3.4 | 8.0 | 6.8  | 9.1  | 3.4  | 1.1 | 5.7  |
| Hep21.T   | 5.8 | 11.6 | 4.7  | 10.5 | 1.2 | 5.8 | 0.0 | 3.5 | 7.0  | 7.0  | 1.2 | 3.5  | 2.3  | 3.5 | 7.0 | 7.0  | 8.1  | 2.3  | 1.2 | 7.0  |
| PMF.PS    | 3.0 | 12.1 | 12.1 | 16.7 | 4.5 | 9.1 | 1.5 | 3.0 | 3.0  | 6.1  | 3.0 | 7.6  | 3.0  | 1.5 | 1.5 | 0.0  | 6.1  | 1.5  | 0.0 | 4.5  |
| PMF.PC    | 3.0 | 12.1 | 12.1 | 16.7 | 4.5 | 9.1 | 1.5 | 3.0 | 4.5  | 6.1  | 3.0 | 7.6  | 3.0  | 1.5 | 0.0 | 0.0  | 6.1  | 1.5  | 0.0 | 4.5  |
| PMF.PY    | 3.0 | 12.1 | 12.1 | 16.7 | 3.0 | 9.1 | 3.0 | 1.5 | 6.1  | 6.1  | 3.0 | 4.5  | 3.0  | 1.5 | 0.0 | 0.0  | 6.1  | 3.0  | 0.0 | 6.1  |
| CD59.H    | 5.2 | 13.0 | 6.5  | 6.5  | 5.2 | 1.3 | 1.3 | 1.3 | 7.8  | 9.1  | 0.0 | 13.0 | 2.6  | 3.9 | 2.6 | 2.6  | 7.8  | 3.9  | 1.3 | 5.2  |
| CD59.M    | 2.7 | 13.7 | 5.5  | 4.1  | 4.1 | 2.7 | 2.7 | 2.7 | 5.5  | 6.8  | 4.1 | 5.5  | 2.7  | 9.6 | 2.7 | 9.6  | 4.1  | 5.5  | 1.4 | 4.1  |
| CD59.R    | 6.3 | 12.7 | 6.3  | 2.5  | 3.8 | 1.3 | 0.0 | 2.5 | 6.3  | 8.9  | 0.0 | 10.1 | 3.8  | 6.3 | 5.1 | 10.1 | 2.5  | 6.3  | 1.3 | 3.8  |
| LY6H.H    | 4.4 | 11.1 | 10.0 | 1.1  | 4.4 | 4.4 | 3.3 | 3.3 | 6.7  | 5.6  | 2.2 | 4.4  | 3.3  | 3.3 | 3.3 | 13.3 | 6.7  | 6.7  | 1.1 | 1.1  |
| LY6H.CM   | 3.3 | 10.0 | 10.0 | 1.1  | 4.4 | 4.4 | 3.3 | 3.3 | 6.7  | 5.6  | 2.2 | 4.4  | 3.3  | 3.3 | 3.3 | 13.3 | 6.7  | 7.8  | 1.1 | 2.2  |
| LY6H.B    | 3.3 | 11.1 | 10.0 | 1.1  | 4.4 | 3.3 | 4.4 | 3.3 | 6.7  | 5.6  | 2.2 | 4.4  | 3.3  | 3.3 | 2.2 | 12.2 | 7.8  | 7.8  | 2.2 | 1.1  |
| LY6H.M    | 4.7 | 11.8 | 10.6 | 1.2  | 4.7 | 2.4 | 3.5 | 3.5 | 7.1  | 5.9  | 2.4 | 4.7  | 3.5  | 3.5 | 3.5 | 12.9 | 4.7  | 7.1  | 1.2 | 1.2  |
| SLURP1.H  | 7.4 | 12.3 | 4.9  | 6.2  | 3.7 | 1.2 | 1.2 | 3.7 | 3.7  | 6.2  | 2.5 | 2.5  | 6.2  | 1.2 | 4.9 | 11.1 | 12.3 | 6.2  | 0.0 | 2.5  |
| SLURP1.M  | 9.1 | 11.4 | 4.5  | 4.5  | 8.0 | 5.7 | 2.3 | 3.4 | 3.4  | 4.5  | 2.3 | 4.5  | 6.8  | 2.3 | 3.4 | 8.0  | 8.0  | 6.8  | 0.0 | 1.1  |
| SLURP2.H  | 2.7 | 13.3 | 5.3  | 1.3  | 1.3 | 9.3 | 6.7 | 5.3 | 1.3  | 9.3  | 1.3 | 2.7  | 5.3  | 2.7 | 4.0 | 9.3  | 10.7 | 5.3  | 1.3 | 1.3  |
| SLURP2.M  | 2.7 | 13.3 | 4.0  | 0.0  | 2.7 | 8.0 | 4.0 | 5.3 | 2.7  | 9.3  | 1.3 | 2.7  | 8.0  | 2.7 | 4.0 | 16.0 | 5.3  | 5.3  | 1.3 | 1.3  |
| Lynx1.H   | 5.5 | 13.7 | 5.5  | 1.4  | 2.7 | 4.1 | 2.7 | 0.0 | 4.1  | 2.7  | 5.5 | 5.5  | 5.5  | 1.4 | 5.5 | 6.8  | 11.0 | 6.8  | 0.0 | 9.6  |
| Lynx1.C   | 5.5 | 13.7 | 5.5  | 1.4  | 2.7 | 4.1 | 2.7 | 0.0 | 4.1  | 2.7  | 5.5 | 5.5  | 5.5  | 1.4 | 5.5 | 6.8  | 11.0 | 6.8  | 0.0 | 9.6  |
| Lynx1.RM  | 5.5 | 13.7 | 5.5  | 1.4  | 2.7 | 2.7 | 2.7 | 0.0 | 4.1  | 2.7  | 5.5 | 5.5  | 5.5  | 1.4 | 4.1 | 9.6  | 11.0 | 6.8  | 0.0 | 9.6  |
| Lynx1.BM  | 5.5 | 13.7 | 5.5  | 1.4  | 2.7 | 4.1 | 2.7 | 0.0 | 4.1  | 2.7  | 5.5 | 5.5  | 5.5  | 1.4 | 4.1 | 8.2  | 11.0 | 6.8  | 0.0 | 9.6  |
| Lynx1.B   | 4.1 | 13.7 | 4.1  | 2.7  | 2.7 | 4.1 | 2.7 | 0.0 | 4.1  | 2.7  | 5.5 | 5.5  | 5.5  | 1.4 | 4.1 | 9.6  | 11.0 | 6.8  | 0.0 | 9.6  |
| Lynx1.M   | 6.8 | 13.7 | 2.7  | 2.7  | 4.1 | 4.1 | 2.7 | 0.0 | 5.5  | 2.7  | 5.5 | 2.7  | 5.5  | 4.1 | 5.5 | 6.8  | 9.6  | 5.5  | 0.0 | 11.0 |

**Table 3:** Physicochemical characterization of different toxin and non-toxin protein sequences

| Sequence ID | No. of amino acids | Molecular weight | pI   | R- | R+ | Instability index | Aliphatic Index | GRAVY  |
|-------------|--------------------|------------------|------|----|----|-------------------|-----------------|--------|
| CX1.BEC     | 60                 | 6696.1           | 9.15 | 3  | 10 | 47.71             | 72.83           | -0.007 |
| CX2.BEC     | 60                 | 6858.3           | 8.99 | 4  | 10 | 66.54             | 66.5            | -0.115 |
| CX3.BEC     | 60                 | 6839.2           | 9.11 | 3  | 10 | 47.89             | 74.5            | -0.035 |
| CX4.BEC     | 60                 | 6802.3           | 9.48 | 1  | 11 | 46.69             | 76.17           | -0.073 |
| CX5.BEC     | 60                 | 6856.4           | 9.26 | 2  | 10 | 62.5              | 66.5            | -0.103 |
| CX6.BEC     | 60                 | 6857.3           | 9.13 | 3  | 10 | 69.4              | 66.5            | -0.115 |
| CX7.BEC     | 60                 | 6856.4           | 9.26 | 2  | 10 | 69.4              | 66.5            | -0.115 |
| CX8.BEC     | 60                 | 6812.2           | 9.26 | 2  | 10 | 60.12             | 74.5            | -0.067 |
| CX9.BEC     | 60                 | 6668.9           | 8.69 | 5  | 9  | 48.78             | 76.17           | -0.037 |
| CX10.BEC    | 60                 | 6681.9           | 8.7  | 4  | 8  | 38.09             | 77.83           | -0.025 |
| CX1.IC      | 60                 | 6791.2           | 9.24 | 3  | 11 | 51.27             | 79.5            | -0.192 |
| CX2.IC      | 60                 | 6763.2           | 9.36 | 2  | 11 | 52.18             | 82.67           | 0.068  |
| CX3.IC      | 60                 | 6745.2           | 9.38 | 2  | 11 | 33.94             | 84.33           | 0.005  |
| CX7.IC      | 60                 | 6792.2           | 9.11 | 4  | 11 | 52.21             | 79.5            | -0.192 |
| NXS1.BEC    | 61                 | 6843.6           | 8.71 | 6  | 10 | 79.01             | 30.33           | -1.213 |
| NXS2.BEC    | 61                 | 6915             | 9.46 | 3  | 12 | 59.26             | 41.48           | -0.928 |
| NXS3.BEC    | 61                 | 6885             | 9.03 | 4  | 10 | 56.6              | 54.26           | -0.577 |
| NXS4.BEC    | 61                 | 6913.1           | 9.18 | 4  | 11 | 53.45             | 54.26           | -0.593 |
| Xenoxin 1   | 66                 | 7235.6           | 8.88 | 5  | 10 | 44.73             | 69.55           | -0.174 |
| Xenoxin 2   | 66                 | 7345.8           | 9.02 | 6  | 12 | 40.3              | 75.45           | -0.239 |
| Xenoxin 3   | 66                 | 7258.6           | 8.87 | 6  | 11 | 34.12             | 75.45           | -0.197 |
| HLMP 1      | 74                 | 8101.3           | 8.82 | 9  | 14 | 7.97              | 53.92           | -0.799 |
| HEP21.C     | 88                 | 10001.2          | 6.73 | 13 | 13 | 26.4              | 55.45           | -0.703 |
| HEP21.T     | 86                 | 9830.1           | 5.44 | 13 | 12 | 37.7              | 53.37           | -0.664 |
| PMF.PS      | 66                 | 7487             | 3.74 | 19 | 3  | 70                | 42.88           | -0.774 |
| PMF.PC      | 66                 | 7459             | 3.74 | 19 | 3  | 71.14             | 42.88           | -0.765 |
| PMF.PY      | 66                 | 7498.1           | 3.96 | 19 | 4  | 69.09             | 41.36           | -0.833 |
| CD59.H      | 77                 | 8961.1           | 5.18 | 10 | 8  | 33.78             | 57.01           | -0.578 |
| CD58.M      | 73                 | 8412.6           | 6.04 | 7  | 6  | 61.92             | 56.03           | -0.315 |
| CD59.R      | 79                 | 8936.1           | 8.09 | 7  | 9  | 45.14             | 69.11           | -0.333 |
| Ly6H.H      | 90                 | 9860.1           | 6.28 | 10 | 9  | 44.63             | 58.44           | -0.261 |
| Ly6H.CM     | 90                 | 9948.2           | 6.28 | 10 | 9  | 44.73             | 60.56           | -0.277 |
| Ly6H.B      | 90                 | 10012.3          | 6.02 | 10 | 8  | 47.57             | 60.56           | -0.224 |
| Ly6H.M      | 85                 | 9456.7           | 6.28 | 10 | 9  | 47.36             | 61.88           | -0.241 |
| SLURP1.H    | 81                 | 8853.1           | 5.16 | 9  | 7  | 56.86             | 63.83           | 0.017  |
| SLURP1.M    | 88                 | 9462.8           | 5.48 | 8  | 6  | 58.1              | 59.89           | 0.114  |
| SLURP2.H    | 75                 | 8023.2           | 6.53 | 5  | 4  | 53.41             | 75.33           | 0.096  |
| SLURP2.M    | 75                 | 7948.2           | 8.12 | 3  | 5  | 68.78             | 75.33           | 0.207  |
| Lynx1.H     | 73                 | 8278.4           | 8.09 | 5  | 7  | 27.8              | 36.03           | -0.321 |
| Lynx1.C     | 73                 | 8278.4           | 8.09 | 5  | 7  | 27.8              | 36.03           | -0.321 |
| Lynx1.RM    | 73                 | 8239.4           | 7.64 | 5  | 6  | 37.99             | 36.03           | -0.275 |
| Lynx1.BM    | 73                 | 8209.3           | 7.64 | 5  | 6  | 35.94             | 36.03           | -0.27  |
| Lynx1.B     | 73                 | 8239.4           | 7.64 | 5  | 6  | 34.9              | 34.66           | -0.305 |
| Lynx1.M     | 73                 | 8372.6           | 8.56 | 4  | 8  | 36.55             | 33.42           | -0.281 |
